# Supplementary material
Source: PubMed Central journal article supplement (PMC3073237)
Supplement: viru0201_0030SD1.pdf [file viru0201_0030SD1.pdf]

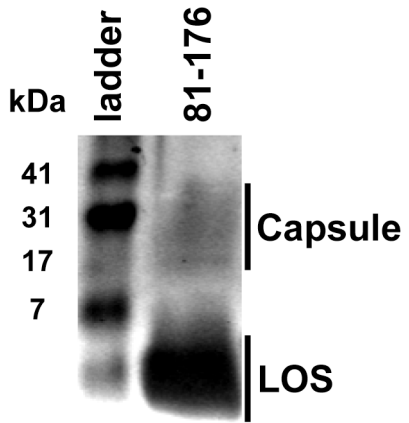

**Supplemental Fig. 1.** Analysis of capsule and LOS expression in *C. jejuni* 81-176. Whole cell proteinase K-digested lysates of *C. jejuni* 81-176 was separated on 12% SDS-PAGE and stained with 0.5% Alcian Blue to reveal capsular polysaccharide and with silver to stain LOS.
